# Supplementary material for: Isolation and Functional Characterization of a Constitutive Promoter in Upland Cotton (Gossypium hirsutum L.)
Source: MDPI journal article supplement (doi:10.3390/ijms25031917), 2024-02-05
Supplement: s1 [file s1]

## Supplementary Materials

**Table S1.** pGhFDH nucleic acid sequence.

| Promoter Name | Sequence                                                                                                                                                                                                                                                                                                                                                                                                                                                                                                                                                                                                                                                                                                                                                                                                                                                                                                         |
|---------------|------------------------------------------------------------------------------------------------------------------------------------------------------------------------------------------------------------------------------------------------------------------------------------------------------------------------------------------------------------------------------------------------------------------------------------------------------------------------------------------------------------------------------------------------------------------------------------------------------------------------------------------------------------------------------------------------------------------------------------------------------------------------------------------------------------------------------------------------------------------------------------------------------------------|
| pGhFDH        | GAAAATCCACAACACCTTGCTCGGCTGTCATTTTCGAGAAAAAATATCTTA<br>ATTTCGAAATTTATTGGATAGTTTAAGTTTTGTGGCATATACATTTTAACCAA<br>AGAAAAAAAACCATGCAGTGGGTATTAAATGGAAATCCAACCGATTGCCTG<br>AATCTGAACCATAACCCTGAACTTGAAATCGGGCAGGATTCCTGTTCCACAA<br>ACCCAACATGTTGAACCAAAGAATCCAGAACCTTCTCTATTTCGGTGTGCAA<br>GTGGTGCTTTGTGGTTTAGACCTTTAAGTCTGCTGCTTTACTACTACCTATTT<br>ATTTCAAGTAAAGATGGTGGTTATGTATTTTATAGATATGTGCAACTAAGG<br>CTTAAACAGCTTATGCCAGCTGCTACCTTCAAAAGGAGAACCTCCCAACTAC<br>TCCCTCCAATGCAATCTTAATTATGGGTTTATTTGTCTTTGCACATTATTTGA<br>GTGCAAAAACAAAATGGAAGGCAAAGGATAAGACTGAATATCCAAAAAAA<br>AATTCACAAGAAAATGTAGGTTCCACAAACAACCTTTATATCACACATACAT<br>GTATTACCAGTTGGTAATCGTAATAAACCAAACAAAAACCCTGTTTTATTGC<br>CTTTGAATTGGACTAGATTTTCATTTAATGAAAGAATTCATGGCGATTTCAAA<br>ACCTTTCACTACTTACCACCGGTCCAAGTTGGTGTAACATTAATACTATATC<br>CACCCACCACCTTTCATCCACATTAATGCATCCCTCTCTCTATATATATG<br>TATGTATGGTGGTGGTTCTTCACCGTTACACCAGGTCTTTTAA |

**Table S2.** Potential cis-acting elements in the pGhFDH promoter sequence using the PLACE and PlantCARE databases.

| Program   | Motif annotation | Motif seq | Position | Strand |
|-----------|------------------|-----------|----------|--------|
| PlantCARE | AAGAA-motif      | GAAAGAA   | -171     | +      |
| PLACE     | ANAERO1CONSENSUS | AAACAAA   | -345     | +      |
| PLACE     | ANAERO1CONSENSUS | AAACAAA   | -221     | +      |
| PLACE     | ANAERO2CONSENSUS | AGCAGC    | -530     | -      |
| PLACE     | ANAERO2CONSENSUS | AGCAGC    | -438     | -      |
| PlantCARE | ARE              | AAACCA    | -709     | +      |
| PlantCARE | ARE              | AAACCA    | -551     | -      |
| PlantCARE | ARE              | AAACCA    | -227     | +      |
| PLACE     | ARR1AT           | NGATT     | -816     | -      |
| PLACE     | ARR1AT           | NGATT     | -682     | -      |
| PLACE     | ARR1AT           | NGATT     | -674     | +      |
| PLACE     | ARR1AT           | NGATT     | -664     | -      |

|                     |             |               |      |   |
|---------------------|-------------|---------------|------|---|
| PLACE               | ARR1AT      | NGATT         | -639 | - |
| PLACE               | ARR1AT      | NGATT         | -630 | + |
| PLACE               | ARR1AT      | NGATT         | -591 | - |
| PLACE               | ARR1AT      | NGATT         | -392 | - |
| PLACE               | ARR1AT      | NGATT         | -235 | - |
| PLACE               | ARR1AT      | NGATT         | -184 | + |
| PLACE               | ARR1AT      | NGATT         | -156 | + |
| PlantCARE           | ATCT-motif  | AATCTAATCC    | -190 | - |
| PLACE               | BIHD1OS     | TGTCA         | -794 | + |
| PlantCARE           | Box 4       | ATTAAT        | -73  | - |
| PlantCARE           | CAAT-BOX    | CCAAT         | -757 | - |
| PlantCARE           | CAAT-BOX    | CAAAT         | -375 | - |
| PlantCARE           | CAAT-BOX    | CAAAT         | -358 | - |
| PlantCARE/PL<br>ACE | CAAT-BOX    | CAAT          | -673 | - |
| PlantCARE/PL<br>ACE | CAAT-BOX    | CAAT          | -399 | + |
| PlantCARE/PL<br>ACE | CAAT-BOX    | CAAT          | -394 | + |
| PlantCARE/PL<br>ACE | CAAT-BOX    | CAAT          | -204 | - |
| PlantCARE/PL<br>ACE | CAAT-BOX    | CCAAT         | -193 | - |
| PLACE               | CAAT-BOX    | CAAT          | -756 | - |
| PLACE               | CACTFTPPCA1 | YACT          | -699 | - |
| PLACE               | CACTFTPPCA1 | YACT          | -562 | - |
| PLACE               | CACTFTPPCA1 | YACT          | -523 | + |
| PLACE               | CACTFTPPCA1 | YACT          | -520 | + |
| PLACE               | CACTFTPPCA1 | YACT          | -502 | - |
| PLACE               | CACTFTPPCA1 | YACT          | -407 | + |
| PLACE               | CACTFTPPCA1 | YACT          | -352 | - |
| PLACE               | CACTFTPPCA1 | YACT          | -136 | + |
| PLACE               | CARGCW8GAT  | CWWWWW<br>WWG | -389 | + |
| PLACE               | CTRMCAV35S  | TCTCTCTCT     | -59  | + |
| PLACE               | DOFCOREZM   | AAAG          | -717 | + |
| PLACE               | DOFCOREZM   | AAAG          | -595 | + |
| PLACE               | DOFCOREZM   | AAAG          | -555 | - |
| PLACE               | DOFCOREZM   | AAAG          | -540 | - |
| PLACE               | DOFCOREZM   | AAAG          | -526 | - |
| PLACE               | DOFCOREZM   | AAAG          | -499 | + |
| PLACE               | DOFCOREZM   | AAAG          | -425 | + |
| PLACE               | DOFCOREZM   | AAAG          | -368 | - |
| PLACE               | DOFCOREZM   | AAAG          | -329 | + |

|           |               |                |      |   |
|-----------|---------------|----------------|------|---|
| PLACE     | DOFCOREZM     | AAAG           | -269 | - |
| PLACE     | DOFCOREZM     | AAAG           | -198 | - |
| PLACE     | DOFCOREZM     | AAAG           | -169 | + |
| PLACE     | DOFCOREZM     | AAAG           | -144 | - |
| PLACE     | DOFCOREZM     | AAAG           | -84  | - |
| PLACE     | DOFCOREZM     | AAAG           | -5   | - |
| PLACE     | DPBFCOREDCDC3 | ACACNNG        | -14  | + |
| PLACE     | EBOXBNNAPA    | CANNTG         | -440 | + |
| PLACE     | EBOXBNNAPA    | CANNTG         | -243 | + |
| PLACE     | EECCRCAH1     | GANTTNC        | -819 | - |
| PLACE     | EECCRCAH1     | GANTTNC        | -629 | + |
| PLACE     | ERELEE4       | AWTTCAAA       | -197 | - |
| PLACE     | ERELEE4       | AWTTCAAA       | -154 | + |
| PLACE     | EVENINGAT     | AAAATATCT      | -778 | + |
| PLACE     | GATABOX       | GATA           | -774 | - |
| PLACE     | GATABOX       | GATA           | -752 | + |
| PLACE     | GATABOX       | GATA           | -473 | + |
| PLACE     | GATABOX       | GATA           | -325 | + |
| PLACE     | GATABOX       | GATA           | -313 | - |
| PLACE     | GATABOX       | GATA           | -264 | - |
| PLACE     | GATABOX       | GATA           | -98  | - |
| PlantCARE | GATA-motif    | AAGGATAAG<br>G | -329 | + |
| PLACE     | GT1CONSENSUS  | GRWAAW         | -819 | + |
| PLACE     | GT1CONSENSUS  | GRWAAW         | -790 | - |
| PLACE     | GT1CONSENSUS  | GRWAAW         | -782 | + |
| PLACE     | GT1CONSENSUS  | GRWAAW         | -714 | + |
| PLACE     | GT1CONSENSUS  | GRWAAW         | -685 | + |
| PLACE     | GT1CONSENSUS  | GRWAAW         | -628 | - |
| PLACE     | GT1CONSENSUS  | GRWAAW         | -292 | + |
| PLACE     | GT1CONSENSUS  | GRWAAW         | -248 | - |
| PLACE     | GT1CONSENSUS  | GRWAAW         | -238 | + |
| PLACE     | GT1CORE       | GGTTAA         | -723 | - |
| PlantCARE | GT1-motif     | GGTTAA         | -724 | - |
| PLACE     | GTGANTG10     | GTGA           | -298 | - |
| PLACE     | GTGANTG10     | GTGA           | -262 | - |
| PLACE     | GTGANTG10     | GTGA           | -22  | - |
| PLACE     | INRNTPSADB    | YTCANTYY       | -321 | - |
| PlantCARE | MYB           | TAACCA         | -723 | + |
| PlantCARE | Myb           | CAACTG         | -244 | - |
| PLACE     | MYB1AT        | WAACCA         | -722 | + |
| PLACE     | MYB1AT        | WAACCA         | -708 | + |
| PLACE     | MYB1AT        | WAACCA         | -550 | - |
| PLACE     | MYB1AT        | WAACCA         | -226 | + |

|              |                   |            |      |   |
|--------------|-------------------|------------|------|---|
| PlantCARE/PL | MYB1AT            | WAACCA     | -491 | - |
| ACE          |                   |            |      |   |
| PLACE        | MYBCORE           | CNGTTR     | -678 | - |
| PLACE        | MYBCORE           | CNGTTR     | -243 | + |
| PLACE        | MYBCORE           | CNGTTR     | -19  | + |
| PLACE        | MYBPLANT          | MACCWAMC   | -225 | + |
| PLACE        | MYBST1            | GGATA      | -753 | + |
| PLACE        | MYBST1            | GGATA      | -326 | + |
| PLACE        | MYBST1            | GGATA      | -98  | - |
| PLACE        | MYCCONSENSUSAT    | CANNTG     | -564 | - |
| PLACE        | MYCCONSENSUSAT    | CANNTG     | -243 | + |
| PLACE        | NTBBF1ARROLB      | ACTTTA     | -270 | + |
| PLACE        | P1BS              | GNATATNC   | -734 | + |
| PLACE        | P1BS              | GNATATNC   | -316 | + |
| PlantCARE    | P-box             | CCTTTTG    | -428 | - |
| PLACE        | POLASIG1          | AATAAA     | -759 | - |
| PLACE        | POLASIG1          | AATAAA     | -511 | - |
| PLACE        | POLASIG1          | AATAAA     | -377 | - |
| PLACE        | POLASIG1          | AATAAA     | -229 | + |
| PLACE        | POLASIG1          | AATAAA     | -206 | - |
| PLACE        | POLASIG3          | AATAAT     | -360 | - |
| PLACE        | POLLEN1LELAT52    | AGAAA      | -783 | + |
| PLACE        | POLLEN1LELAT52    | AGAAA      | -715 | + |
| PLACE        | POLLEN1LELAT52    | AGAAA      | -293 | + |
|              |                   | SCGAYNRNNN |      |   |
| PLACE        | PRECONSCRHSP70A   | NNNNNNNNN  | -675 | + |
|              |                   | NNNHD      |      |   |
| PLACE        | PYRIMIDINEBOXOSRA | CCTTTT     | -426 | - |
|              | MY1A              |            |      |   |
| PLACE        | RAV1AAT           | CAACA      | -810 | + |
| PLACE        | RAV1AAT           | CAACA      | -609 | + |
| PLACE        | RAV1AAT           | CAACA      | -604 | - |
| PLACE        | RBCSCONSENSUS     | AATCCAA    | -682 | + |
| PLACE        | REALPHALGLHCB21   | AACCAA     | -721 | + |
| PLACE        | REALPHALGLHCB21   | AACCAA     | -599 | + |
| PLACE        | ROOTMOTIFTAPOX1   | ATATT      | -776 | - |
| PLACE        | ROOTMOTIFTAPOX1   | ATATT      | -315 | - |
| PLACE        | RYREPEATBNNAPA    | CATGCA     | -704 | + |
| PLACE        | SEF3MOTIFGM       | AACCCA     | -697 | - |
| PLACE        | SEF3MOTIFGM       | AACCCA     | -613 | + |
| PLACE        | SEF3MOTIFGM       | AACCCA     | -381 | - |
| PLACE        | SEF4MOTIFGM7S     | RTTTTTR    | -348 | - |
| PLACE        | SEF4MOTIFGM7S     | RTTTTTR    | -218 | - |
| PLACE        | SORLIP1AT         | GCCAC      | -737 | - |

|                     |               |                |      |   |
|---------------------|---------------|----------------|------|---|
| PLACE               | SV40COREENHAN | GTGGWWHG       | -134 | - |
| PLACE               | TAAAGSTKST1   | TAAAG          | -540 | - |
| PLACE               | TAAAGSTKST1   | TAAAG          | -526 | - |
| PLACE               | TAAAGSTKST1   | TAAAG          | -500 | + |
| PlantCARE           | TATA-BOX      | TATA           | -732 | + |
| PlantCARE           | TATA-BOX      | TATA           | -267 | - |
| PlantCARE           | TATA-BOX      | TATA           | -101 | - |
| PlantCARE           | TATA-BOX      | TATATA         | -52  | - |
| PlantCARE           | TATA-BOX      | TATATA         | -48  | - |
| PlantCARE/PL<br>ACE | TATA-BOX      | ccTATAAAaa     | -482 | - |
| PlantCARE/P<br>ALCE | TATA-BOX      | TATTAAT        | -692 | + |
| PLACE               | TATA-BOX      | TTATTT         | -510 | + |
| PLACE               | TATA-BOX      | TTATTT         | -376 | + |
| PLACE               | TATA-BOX      | TTATTT         | -359 | + |
| PLACE               | TATCCAOSAMY   | TATCCA         | -754 | - |
| PLACE               | TATCCAOSAMY   | TATCCA         | -98  | + |
| PlantCARE           | Unnamed__4    | CTCC           | -423 | - |
| PlantCARE           | Unnamed__4    | CTCC           | -416 | + |
| PlantCARE           | Unnamed__4    | CTCC           | -406 | + |
| PlantCARE           | Unnamed__4    | CTCC           | -402 | + |
| PlantCARE           | WRE3          | CCACCT         | -89  | + |
| PLACE               | WRKY71OS      | TGAC           | -793 | - |
| PLACE               | WUSATAg       | TTAATGG        | -690 | + |
| PlantCARE           |               | motif_sequence | -624 | + |
| PlantCARE           |               | motif_sequence | -471 | + |
| PlantCARE           |               | motif_sequence | -365 | - |

---

**Table S3.** Primer Sequences.

| Primer name | Primer sequence (5'-3')              | Note                                          |
|-------------|--------------------------------------|-----------------------------------------------|
| BP-pGhFDH-F | GGGGACAAGTTTGTACAAAAAAGCAGGCTGCCTTGC | Expression<br>vector<br>construction          |
|             | TCGGCTGTCATTTTCG                     |                                               |
| BP-pGhFDH-R | GGGGACCACTTTGTACAAGAAAGCTGGGTGATTAAA |                                               |
|             | AGACCTGGTGTAAACGGTG                  |                                               |
| GhUB7-F     | GAAGGCATTCCACCTGACCAAC               | qRT-PCR                                       |
| GhUB7-R     | CTTGACCTTCTTCTTCTTGTGCTTG            |                                               |
| GhFDH-qRT-F | TCGATGAAGCGAGTCTTGAA                 |                                               |
| GhFDH-qRT-R | CCGAGGTTGTAGCTCAAAAT                 |                                               |
| M13-F       | CGCCAGGGTTTTCCAGTCACGAC              | E. coli positive<br>test                      |
| M13-R       | CACACAGGAAACAGCTATGAC                |                                               |
| NPTII-F     | GTCATACCACTTGTCCGCCCT                | Agrobacterium<br>tumefaciensposi<br>tive test |
| NPTII-R     | CAGCCGGTATAAAGGGACCACC               |                                               |
| GUS-F       | TGTAACCACGCGTCTGTTGACTG              | GUS genetic<br>testing                        |
| GUS-R       | AATACTCCACATCACCACGC                 |                                               |

**Table S4.** GUS activity in different tissues and developmental periods.

|                             | Line                              | Tissue        | 1        | 2        | 3        | Average value |
|-----------------------------|-----------------------------------|---------------|----------|----------|----------|---------------|
| <i>Arabidopsis thaliana</i> | <i>CaMV35S</i><br>:: <i>GUS</i>   | Root          | 7253.5   | 7116.13  | 7319.64  | 7229.756667   |
|                             |                                   | Stalk         | 9202.3   | 9134.11  | 9333.96  | 9223.456667   |
|                             |                                   | Leaf          | 6531.07  | 6479.23  | 6490.3   | 6500.2        |
|                             |                                   | Inflorescence | 5799.51  | 5988.32  | 5978.92  | 5922.25       |
|                             |                                   | Pod           | 3816.11  | 3752.98  | 3789.25  | 3786.113333   |
|                             | <i>pGhFDH</i> :<br>: <i>GUS-1</i> | Root          | 6800.3   | 6671.3   | 6417.1   | 6629.566667   |
|                             |                                   | Stalk         | 9216.25  | 9365.21  | 9319.88  | 9300.446667   |
|                             |                                   | Leaf          | 6319.12  | 6264.25  | 6119.89  | 6234.42       |
|                             |                                   | Inflorescence | 8481.4   | 8215.3   | 7799.97  | 8165.556667   |
|                             |                                   | Pod           | 1998.51  | 2141.87  | 1923.64  | 2021.34       |
|                             | <i>pGhFDH</i> :<br>: <i>GUS-2</i> | Root          | 8520.16  | 8560.89  | 8546.66  | 8542.57       |
|                             |                                   | Stalk         | 7762.28  | 7796.35  | 7782.16  | 7780.263333   |
|                             |                                   | Leaf          | 5919.91  | 5917.08  | 5841.64  | 5892.876667   |
|                             |                                   | Inflorescence | 6835.1   | 6834.81  | 6820.66  | 6830.19       |
|                             |                                   | Pod           | 2017.09  | 2106.38  | 2019.82  | 2047.763333   |
| Cotton                      | <i>CaMV35S</i><br>:: <i>GUS</i>   | Leaf          | 6532.01  | 6621.12  | 6561.14  | 6571.423333   |
|                             |                                   | Stalk         | 13854.22 | 13776.02 | 13655.79 | 13762.01      |
|                             |                                   | Bud           | 16901.63 | 16814.47 | 16892.96 | 16869.68667   |
|                             |                                   | Petal         | 9570.81  | 9568.31  | 9544.23  | 9561.116667   |
|                             |                                   | Anther        | 28031.29 | 28315.56 | 28115.61 | 28154.15333   |
|                             |                                   | Shoot tip     | 6281.94  | 6221.33  | 6257.66  | 6253.643333   |

|                |              |          |          |          |             |
|----------------|--------------|----------|----------|----------|-------------|
|                | 0 DPA        | 4682.33  | 4671.59  | 4661.66  | 4671.86     |
|                | 5 DPA        | 3259.36  | 3126.01  | 3216.01  | 3200.46     |
|                | 10 DPA       | 1672.31  | 1668.96  | 1669.25  | 1670.173333 |
|                | 20 DPA       | 3603.33  | 3608.65  | 3587.14  | 3599.706667 |
|                | 30 DPA       | 5846.23  | 5755.55  | 5799.21  | 5800.33     |
|                | Mature fiber | 900.00   | 887.36   | 881.31   | 889.556667  |
|                | Leaf         | 8537.36  | 8716.59  | 8605.69  | 8619.88     |
|                | Stalk        | 5406.28  | 5395.79  | 5398.12  | 5400.063333 |
|                | Bud          | 15635.57 | 15580.29 | 15643.59 | 15619.81667 |
|                | Petal        | 14931.20 | 14952.33 | 14907.02 | 14930.18333 |
|                | Anther       | 30321.5  | 30305.59 | 30304.25 | 30310.44667 |
| <i>pGhFDH:</i> | Shoot tip    | 4635.55  | 4636.17  | 4622.26  | 4631.326667 |
| <i>:GUS-1</i>  | 0 DPA        | 7956.33  | 7954.12  | 7946.76  | 7952.403333 |
|                | 5 DPA        | 4779.56  | 4784.26  | 4632.93  | 4732.25     |
|                | 10 DPA       | 12615.26 | 12510.36 | 12465.10 | 12530.24    |
|                | 20 DPA       | 32150.69 | 31962.33 | 31887.84 | 32000.28667 |
|                | 30 DPA       | 17532.59 | 17398.46 | 17462.83 | 17464.62667 |
|                | Mature fiber | 1231.54  | 1233.12  | 1136.56  | 1200.406667 |
|                | Leaf         | 7547.66  | 7616.53  | 7695.65  | 7619.946667 |
|                | Stalk        | 6854.32  | 6802.16  | 6745.01  | 6800.496667 |
|                | Bud          | 13967.2  | 13864.4  | 13847.6  | 13893.06667 |
|                | Petal        | 16760.81 | 16763.56 | 16771.33 | 16765.23333 |
|                | Anther       | 31269.55 | 31267.84 | 31236.86 | 31258.08333 |
| <i>pGhFDH:</i> | Shoot tip    | 3987.41  | 4031.87  | 3866.37  | 3961.883333 |
| <i>:GUS-2</i>  | 0 DPA        | 8406.25  | 8238.36  | 8326.22  | 8323.61     |
|                | 5 DPA        | 3935.35  | 3892.01  | 3842.54  | 3889.966667 |
|                | 10 DPA       | 10603.52 | 10514.16 | 10352.97 | 10490.21667 |
|                | 20 DPA       | 36213.05 | 36138.79 | 36009.2  | 36120.34667 |
|                | 30 DPA       | 18149.31 | 18138.08 | 18316.2  | 18201.19667 |
|                | Mature fiber | 1318.26  | 1328.36  | 1305.79  | 1317.47     |
